# Supplementary material for: Neuron navigator 3a regulates liver organogenesis during zebrafish embryogenesis
Source: Oxford University Press journal article supplement (doi:10.1242/dev.056861), 2011-04-07

1            10            20            30            40            50            60            70            80            90

Nav3a danio rerio **MPVVG**VASKLRQPT**VGSRPIHTALPIPNLGRSSMAHGLAPR**SSSELRVTE**SPMLSCQLSFKTEI**HDRRTNL**V**PAPAATLARSSRE**AEE**SKICKIYT

NAV-3 human **MPVL**GVASKLRQPA**VGSKPVHTALPIPNLGT**TTG**SQHCSSRPLE**ELTET**ESSMLSCQLALKST**CEFGEKK**PLQG**-----K**AKEKED**SKIYT

NAV-3 mouse **MPVL**GVASKLRQPA**VGPKPVHVALPIPNLGI**-**SVSRRCSSRPLE**FAT**PER**S**MLSCQLTLKST**CEFGEKK**ALQG**-----T**AKEI**EDSKIYT

NAV-3 rat **MPVL**GVASKLRQPA**VGPKPVHVALPIPNLGI**-**SVSQRCS**SRPLEFAT**PER**S**ILSCQLTLKST**CEFGEKK**ALQG**-----T**AKDI**EDSKIYT

NAV-3 takifugu

NAV-3 tetraodon

UNC53-L

100            110            120            130            140            150            160            170            180            190

Nav3a danio rerio **DWANHYLAKSGCPRLIKDLTODI**PDGVLLAEIIQIIANEK**I**EDIN**S**CPKSH**SOMIENVE**CL**SFL**GA**RGVSVQGLSAE**--**EV**C**NGN**LKSILGLF

NAV-3 human **DWANHYLAKSGHKKRLIKDLQODI**ADGVLLAEIIQIIANEK**V**EDIN**G**CPRS**SOMIENVD**CL**SFL**GA**RGVNVQGLSAE**--**EIR**NGNLKAILGLF

NAV-3 mouse **DWANHYLAKSGHKKRLIKDLQODI**ADGVLLADIIQIIANEK**V**EDIN**G**CPRS**SOMIENVD**CL**SFL**GA**RGVNVQGLSAE**--**EIR**NGNLKAILGLF

NAV-3 rat **DWANHYLAKSGHKKRLIKDLQODI**ADGVLLADIIQIIANEK**V**EDIN**G**CPRS**SOMIENVD**CL**SFL**GA**RGVNVQGLSAE**--**EIR**NGNLKAILGLF

NAV-3 takifugu **DWANHYLAKSGHKKRLIKDLQODI**ADGVLLADIIQIIANEK**V**EDIN**G**CPRS**SOMIENVD**CL**SFL**GA**RGVNVQGLSAE**--**EIR**NGNLK**SILGLF**

NAV-3 tetraodon **DWANHYLAKSGHKKRLIKDLQODI**ADGVLLADIIQIIANEK**V**EDIN**G**CPRS**SOMIENVD**CL**SFL**GA**RGVNVQGLSAE**ASP**EIR**NGNLK**SILGLF**

UNC53-L

200            210            220            230            240            250            260            270            280

Nav3a danio rerio **FI**L**S**RYK**Q**Q**Q**HH**Q**Q**Q**Y**L**Q**S**L**V**E**L**Q**Q**H**V**T**H**Q**T**T**G**A**A**Q**L**S**Q**H**K**T**Q**D**M**S**R**L-----P-----G-----

NAV-3 human **FS**L**S**RYK**Q**Q**Q**HH**Q**Q**Q**Y**Y**Q**S**L**V**E**L**Q**Q**R**V**T**H**A**S**P**P**S**E**A**S**Q**A**K**T**Q**Q**D**M**S**S**L**A**A**R**Y**A**T**Q**S**N**H**S**-----G**I**A**T**S**Q**K**K**P**T**R-----

NAV-3 mouse **FS**L**S**RYK**Q**Q**Q**HH**Q**Q**Q**Y**Y**Q**S**L**V**E**L**Q**Q**R**V**T**H**A**P**Q**S**E**A**S**Q**A**K**T**Q**Q**D**M**S**S**L**T**A**R**Y**A**A**Q**S**K**H**S-----G**I**A**T**S**Q**K**K**P**T**R-----

NAV-3 rat **FS**L**S**RYK**Q**Q**Q**HH**Q**Q**Q**Y**Y**Q**S**L**V**E**L**Q**Q**R**V**T**H**A**A**P**Q**S**E**A**S**Q**A**K**T**Q**Q**D**M**S**S**L**T**A**R**Y**A**A**Q**S**K**H**S**-----G**I**A**T**S**Q**K**K**P**T**R-----

NAV-3 takifugu **FI**L**S**RYK**Q**Q**Q**Q**Q**Q**Q**Y**Y**Q**S**L**V**E**L**S**Q**Q**T**S**S**S**T**S**S**A**S**S**L**K**T**Q**E**M**Q**S**S**V**N**S**T**P**E**S**P**T**K**S**Y**Q**H**D**L**L**Q**G**Q**L**E**M**D**F**V**A**D**T**K**K**H**T**S**N**P**R**L**L**R**S**E**I**T**L**A**M**C**V**L**

NAV-3 tetraodon **FI**L**S**RY-----**Y**Q**S**L**V**E**L**S**Q**Q**T**G**S**T**A**S**S**S**S**G**L**K**T**---**Q**E**M**S**S**L**T**A**R**Y**A**S**P**P**G**H**G**-----G**I**G**S**P**Q**K**K**N**T**R-----

UNC53-L

290            300            310            320            330            340            350            360            370            380

Nav3a danio rerio -----**PSRVPAAGSGSSSKGSSNLNRRSPSFNSIDKSKPL**---**QYA**-**SGNDR**ES**VKGI**PLPG**S**M**NGS**---**G**S**V**P**S****S**T**S**G**Q**Q**L****ASA**I**P**S**P**T**AG**K

NAV-3 human --**LPGPSRVPAAGS**-**SSK**V**Q****G**A**S**N**L**N**R**R**S**Q**S**F**N**S**I**D**K**N**K**P---**P**N**Y**A-**NGNE**K**D**S**S**K**G**P**Q**S**S****S**G**V**N**G**N---**V**Q**P**P**S**T**A**G**Q**P**P****ASA**I**P**S**P**S**A**S**K**

NAV-3 mouse --**LPGPSRVPAAGS**-**S**N**K**A**Q****G**A**S**N**L**N**R**R**S**Q**S**F**N**S**I**D**K**N**K**P---**P**N**Y**A-**NGNE**K**D**S**P**K**G**P**Q**P**S****S**G**I**N**G**N---**T**Q**P**P**S**T**S**G**Q**P**P****ASA**I**P**S**P**S**A**S**K**

NAV-3 rat --**SVHVSNL**L**F**A**S**D-**I**H**V**N**A****G**P**S**N**G**Q**Q**T**S**R**T**F**R**N**I**F**K**R**N**S---**P**S-**A**-**M**N**L**K**D**S**S**K**G**P**Q**P**S****S**G**I**N**G**N---**T**Q**P**P**S**T**S**G**Q**P**P****ASA**I**P**S**P**N**A**S**K**

NAV-3 takifugu **Y**M**L**P**G**P**S**R**V****S**A**A**G**S****G**V**S**R**S**P**G**S**S**N**L**N**R**R**S**Q**S**F**N**S**I**D**K**N**K**P**L**H**S**K**P**V**M**P**I**N**Q**Q**R**E**E**A**A**R**G**L**P**A**A**G**G**M**NGS****G**T**G**T**V**T**T****S**L**S**G**Q**Q**L****ASA**I**P**S**P**N**A**S**K**

NAV-3 tetraodon --**LPGPSRVPAAGSGVSRSPGSSNLNRRS**Q**S**F**N**S**I**D**K**S**K**P---**L**Q**Y**A-**SGNDR**E**A**A**R**S**L**P**A**A**G**G**M**NG**S****S**I**G**G**T**V**T**T**S**L**S**G**Q**Q**L****ASA**I**P**S**P**N**A**S**K**

UNC53-L

390            400            410            420            430            440            450            460            470

Nav3a danio rerio **T**W**R**S**K**S**M**N**M**K**H**S**A**T**S**S**M**L**A**T**K**P**P****S**P**T**S**S**P**T**P**P**S**S**S**D**R**L**R**P**P**I**T**D**A**S**--**K**S**A**P**G**N**Q**R**S**M**L**E**K**F**R**I**L**N**P**R**A**T**S****R**T---**S**P**S**V**A**E**M**A**L****Q**E**E**D**D**L**S**E**F**G

NAV-3 human **P**W**R**S**K**S**M**N**V**K**H**S**A**T**S**T**M**L**T**V**K**Q**S****S**T**A**T**S**P**T**P---**S**S**D**R**L**K**P**P**V**S**E**G**V**--**K**T**A**P**S**G**Q**K**S**M**L**E**K**F**K**L**V**N**A**R**T**A**L**R**P**P**Q**P**P**S**S**G**P**S**D**G**G****K**D**D**D**A**F**S**E**S**G

NAV-3 mouse **P**W**R**S**K**S**M**N**V**K**H**S**A**T**S**T**M**L**T**V**K**Q**P****S**P**A**T**S**P**T**P---**S**S**D**R**L**K**P**P**V**T**E**G**V**--**K**S**A**P**S**G**Q**K**S**M**L**E**K**F**K**L**V**N**A**R**T**A**L**R**P**P**Q**A**P**S**S**G**P**N**D**G**G****R**E**D**D**A**F**S**E**S**G

NAV-3 rat **P**W**R**S**K**S**M**N**V**K**H**S**A**T**S**T**M**L**T**V**K**Q**P****S**P**A**T**S**P**T**P---**S**S**D**R**L**K**P**P**V**T**E**G**V**--**K**S**A**P**S**G**Q**K**S**M**L**E**K**F**K**L**V**N**A**R**T**A**L**R**P**P**Q**A**T**S**S**G**P**N**D**S**G****K**D**D**D**A**F**S**E**S**G

NAV-3 takifugu **S**W**R**S**K**S**M**N**L**K**H**S**A**T**S**S**M**L**A**S**P**T**H****T**P**S**Q**R**M-----**L**G**G**A**G**P**Q**R**S**M**L**D**K**F**R**I**L**N**P**R**S**A**S**R---**A**S**P****S**V**A**E**M**A**L****Q**E**E**D**D**L**S**E**C**G

NAV-3 tetraodon **S**W**R**S**K**S**M**N**L**K**H**S**A**T**S**S**M**L**A**S**P**T**H****T**P**S**Q**S**Q**S**N**P**A**P**E**C**F**L**Q**H**S**S**D**G**S**K**A**G**L**G**G**G**G**P****Q**R**S**M**L**D**K**F**R**I**L**N**P**R**S**A**S**R---**A**S**P****S**V**A**E**M**A**L****Q**E**E**D**D**L**S**E**C**S

UNC53-L



## Supplement Figure S2

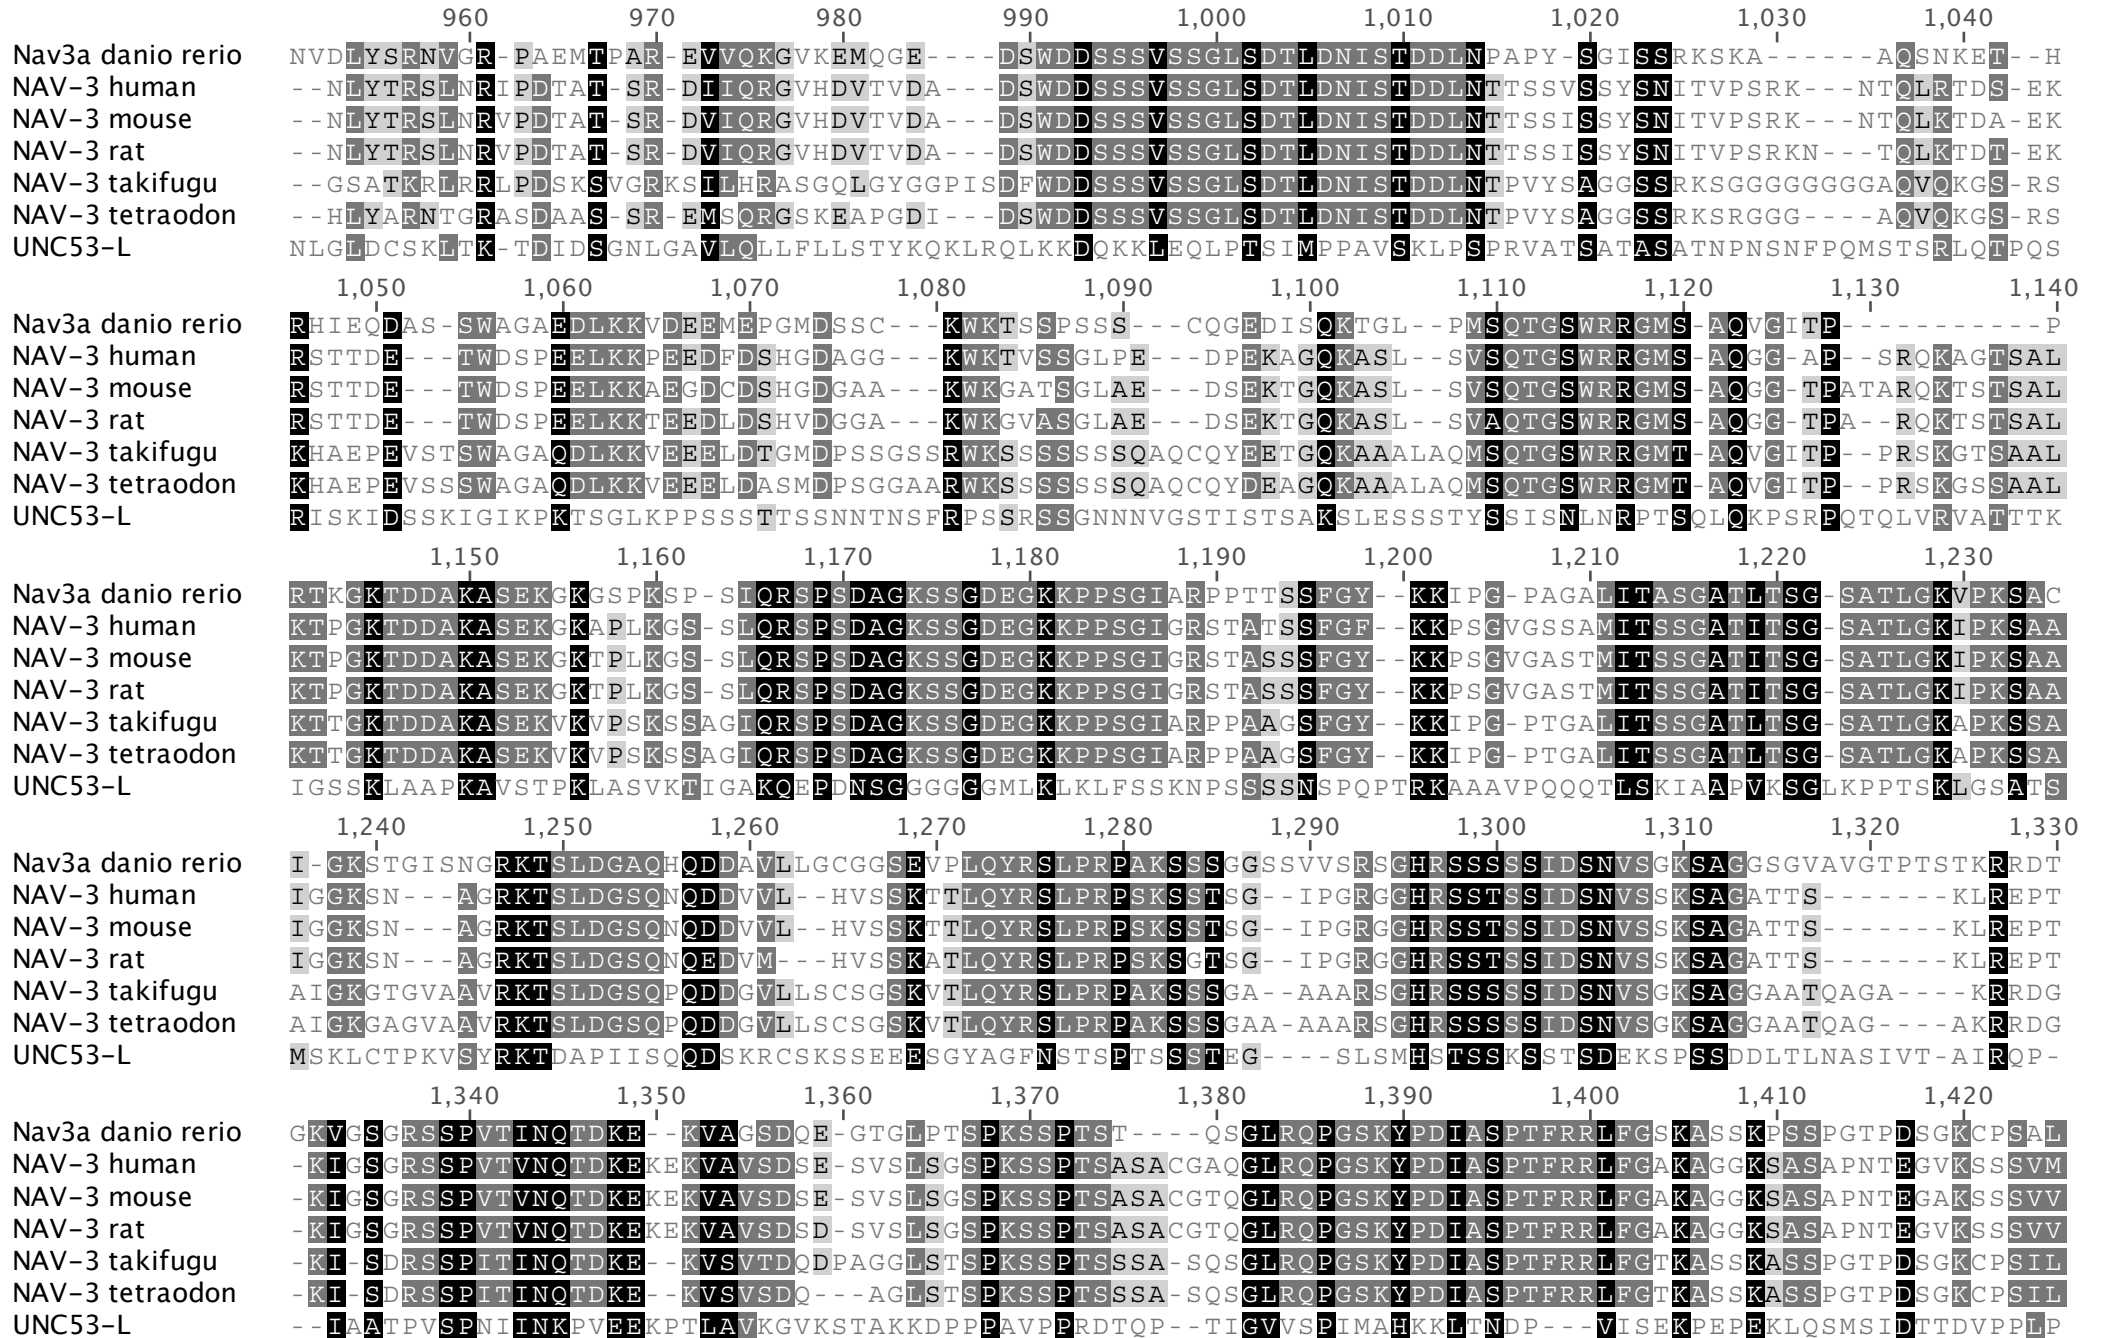

## Supplement Figure S2

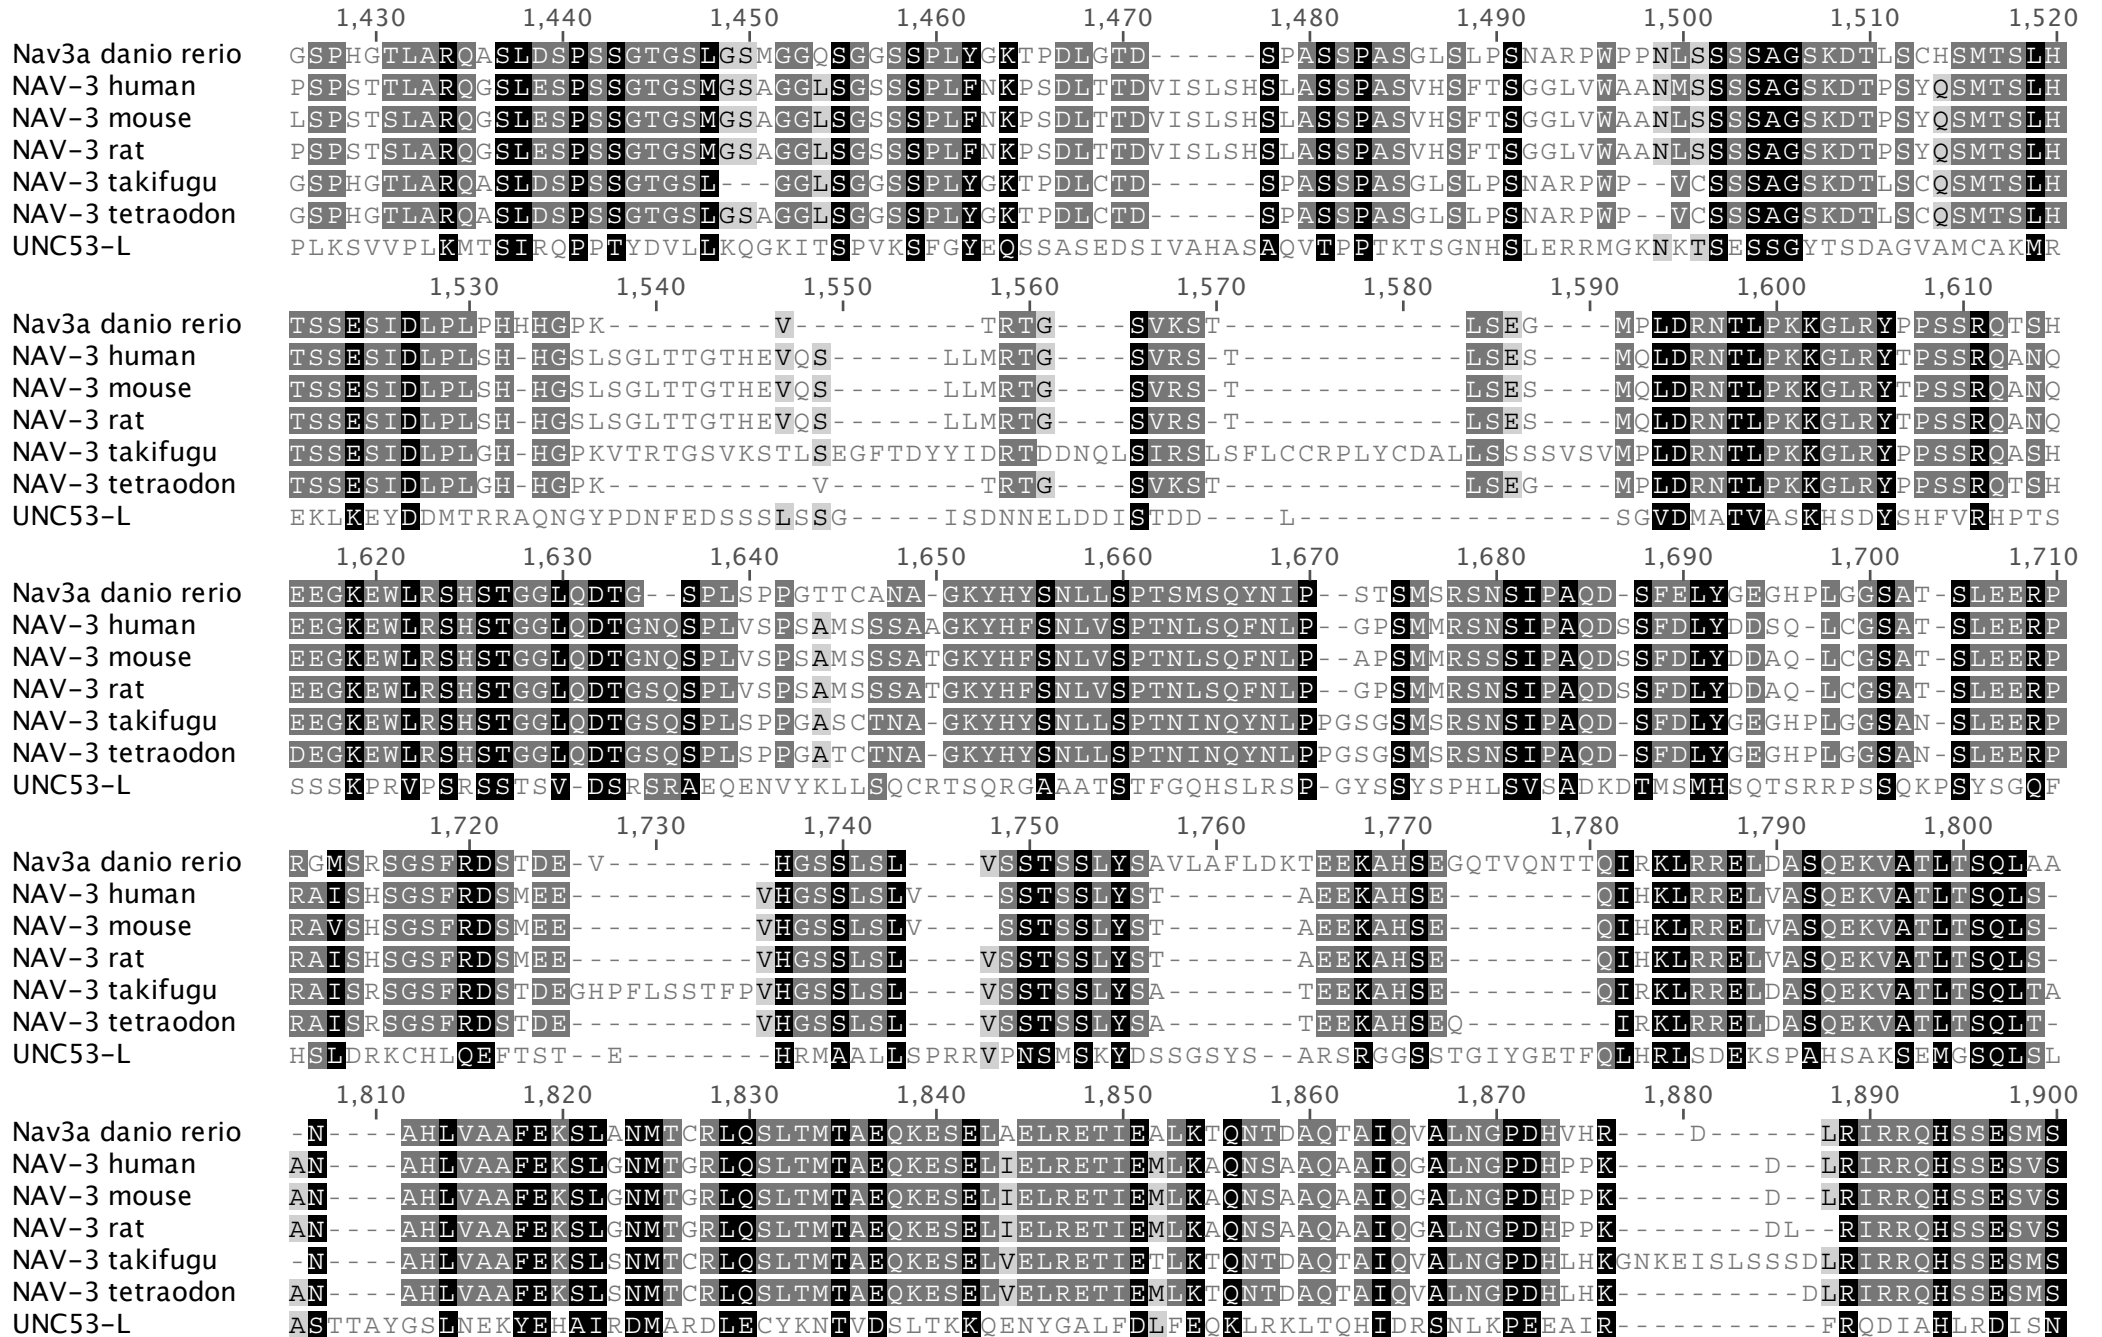

## Supplement Figure S2

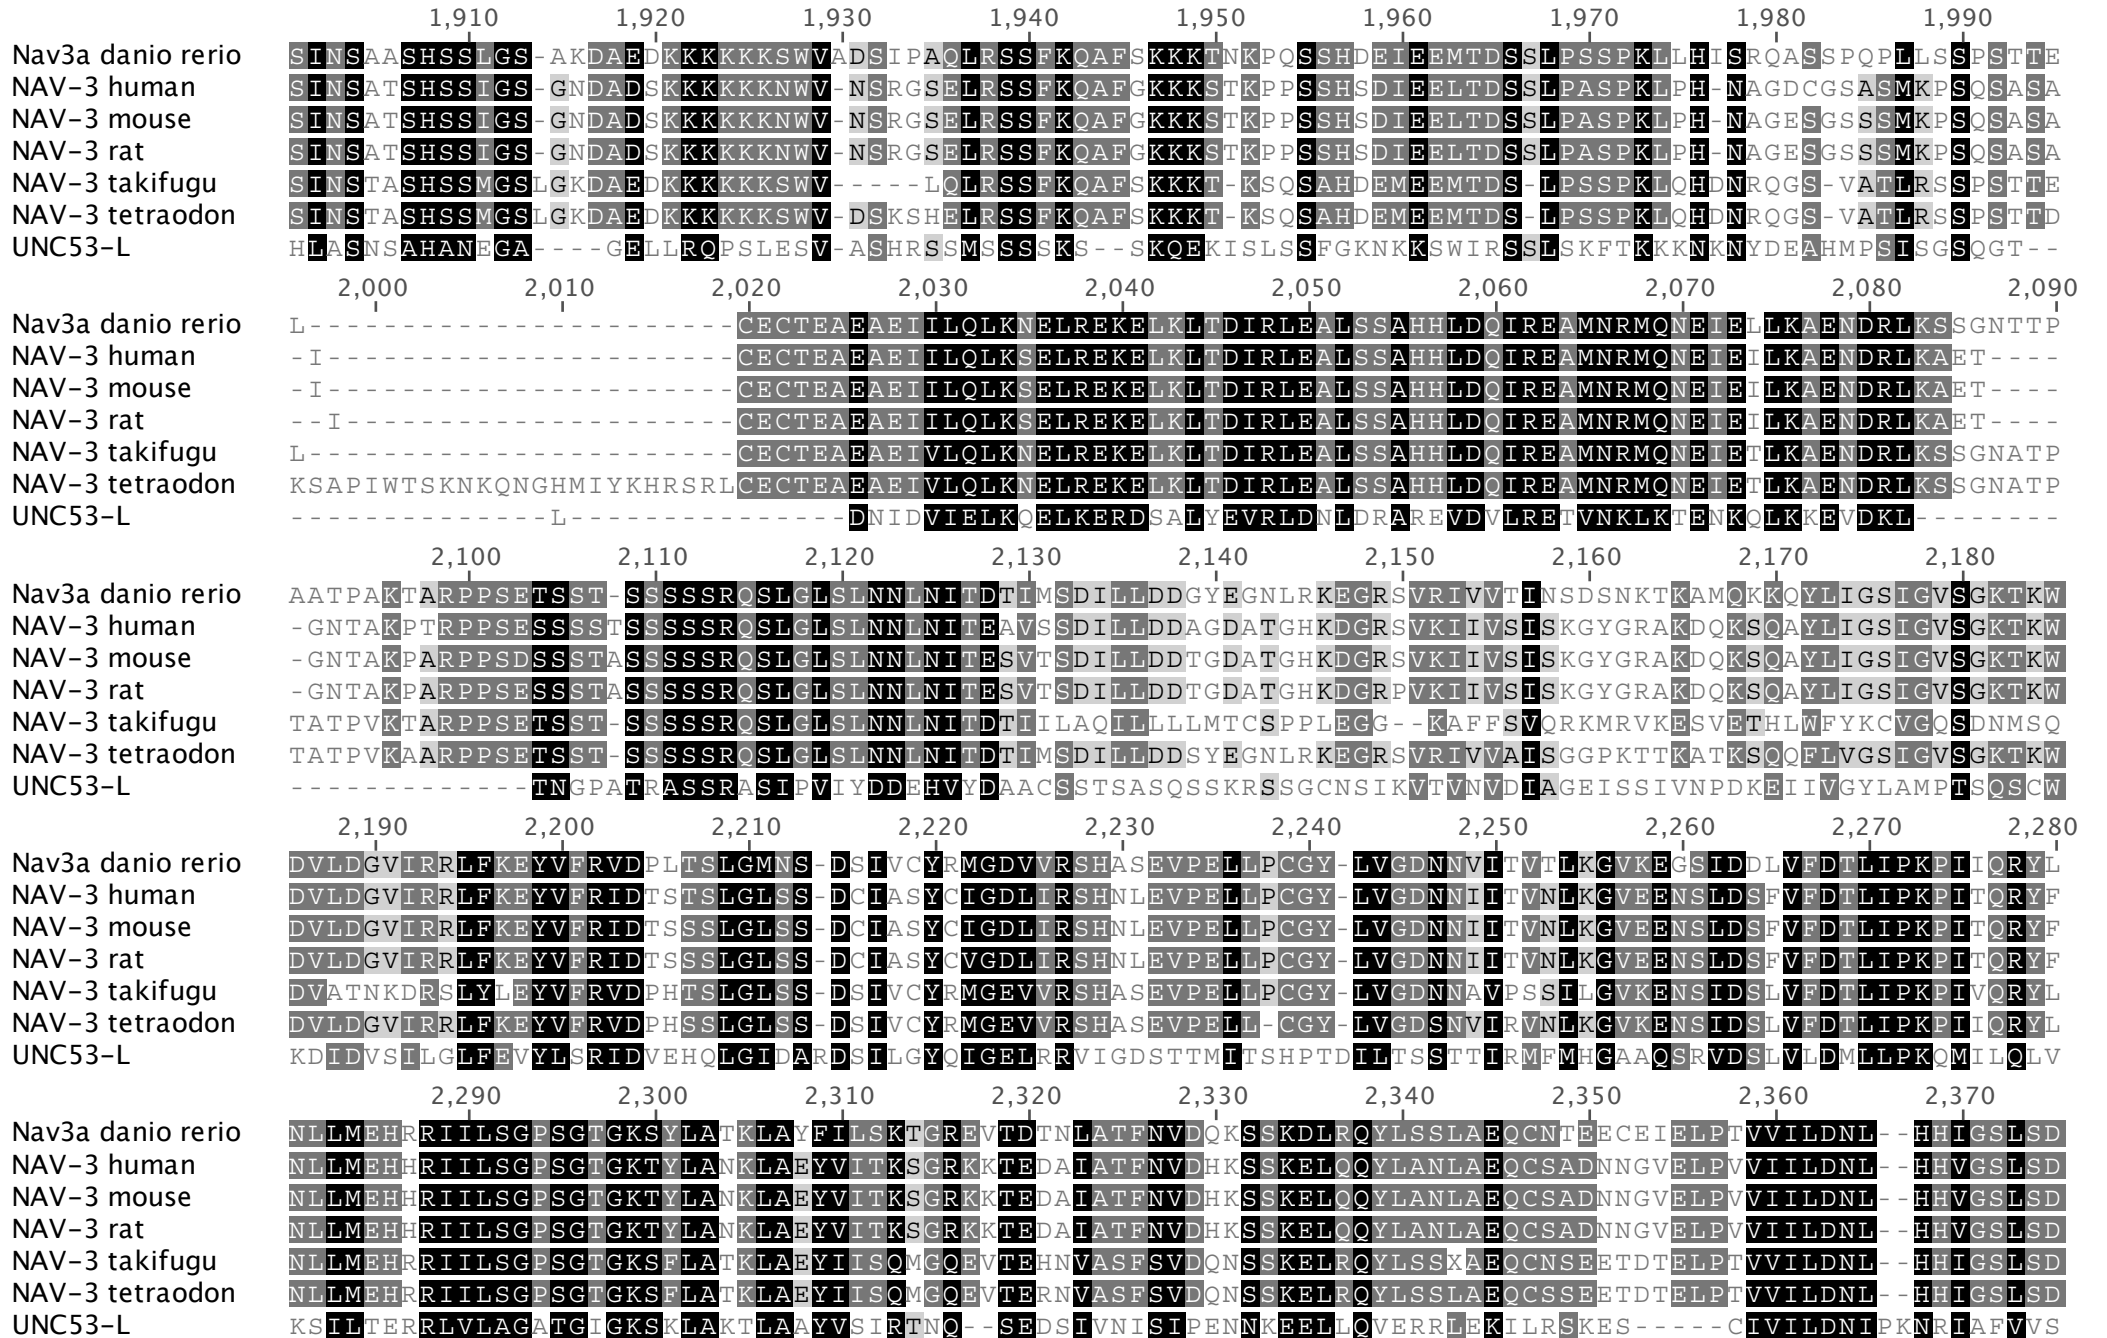

### Supplement Figure S2

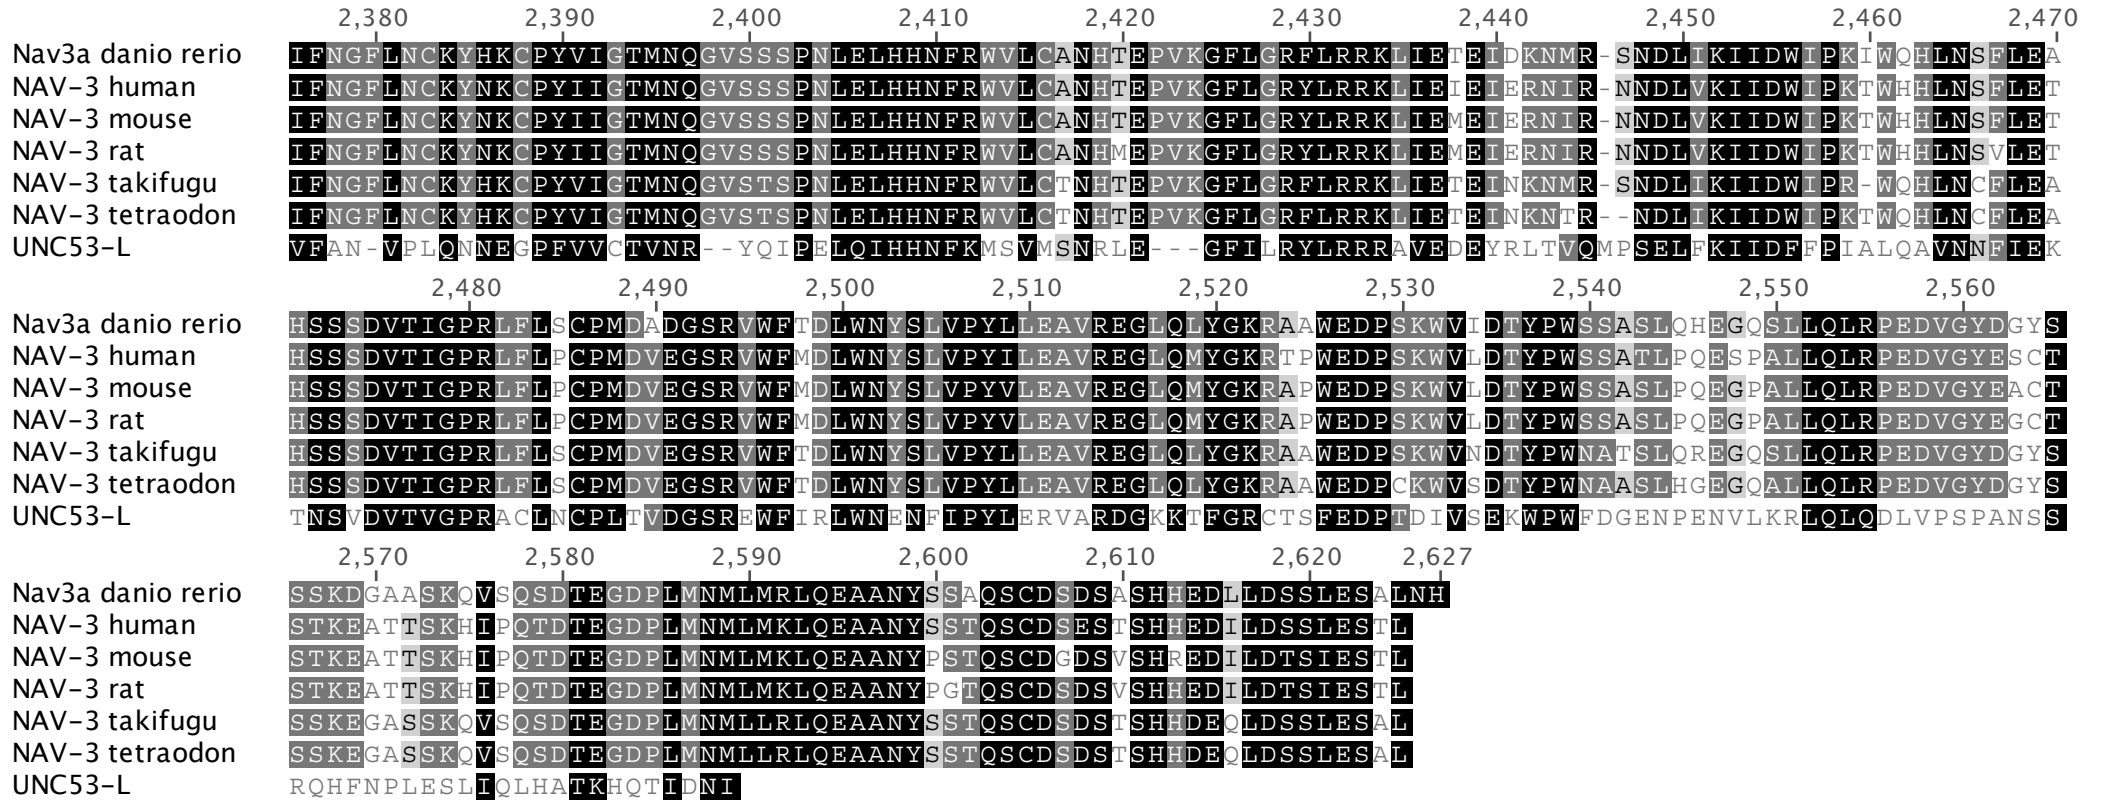

Supplement: dev056861figs2.pdf [file dev056861figs2.pdf]
