# Supplementary figures and images for: Neuron navigator 3a regulates liver organogenesis during zebrafish embryogenesis
Source: Oxford University Press journal article supplement (doi:10.1242/dev.056861), 2011-04-07

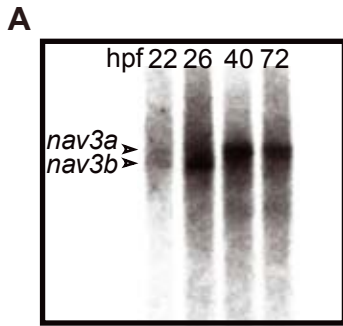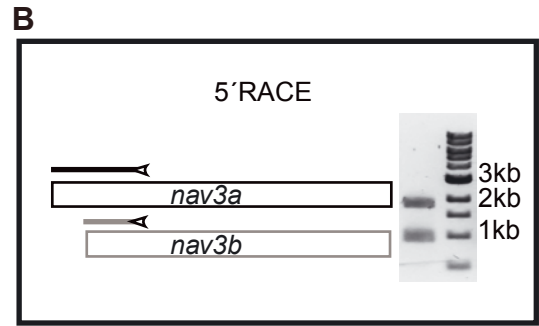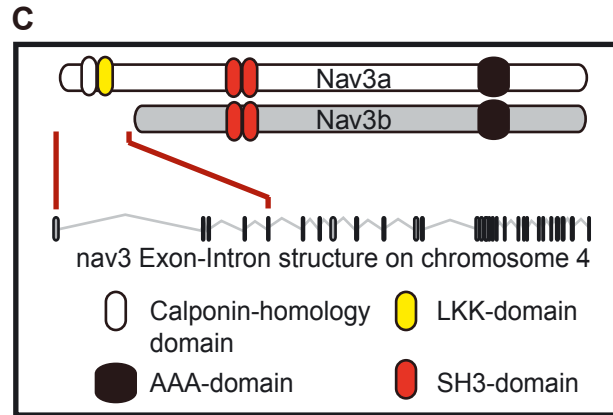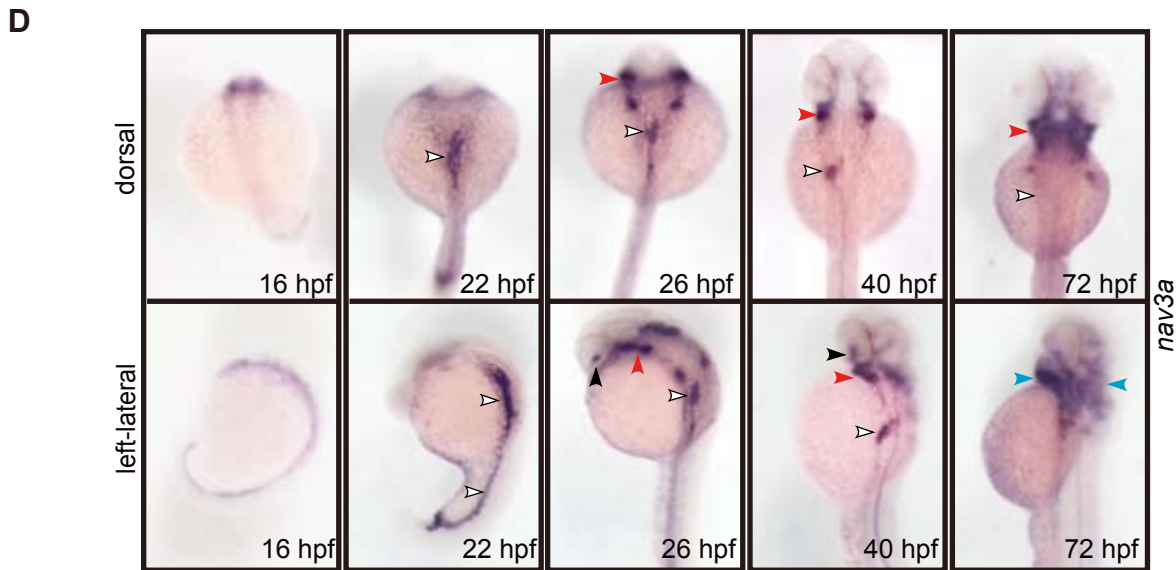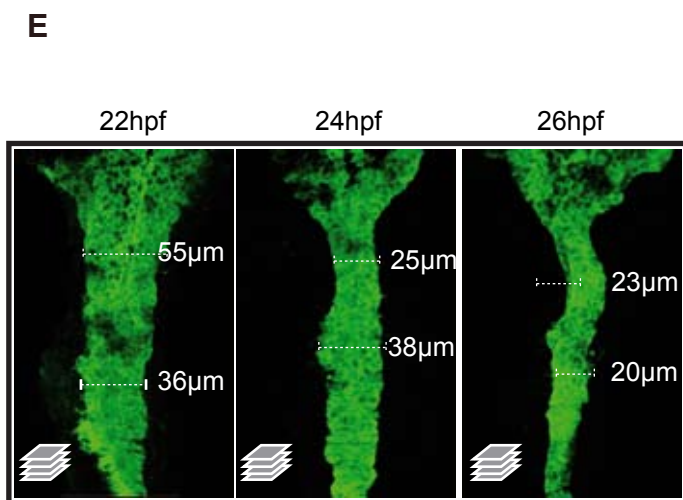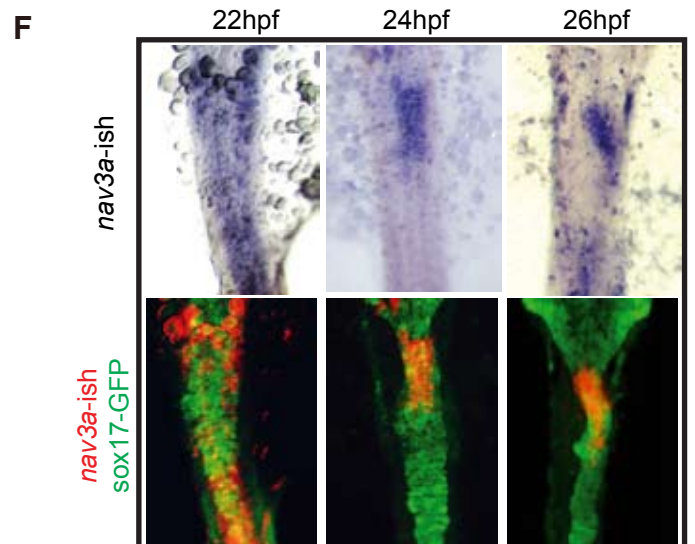

Supplement: dev056861figs1.pdf [file dev056861figs1.pdf]

A)

control-mo

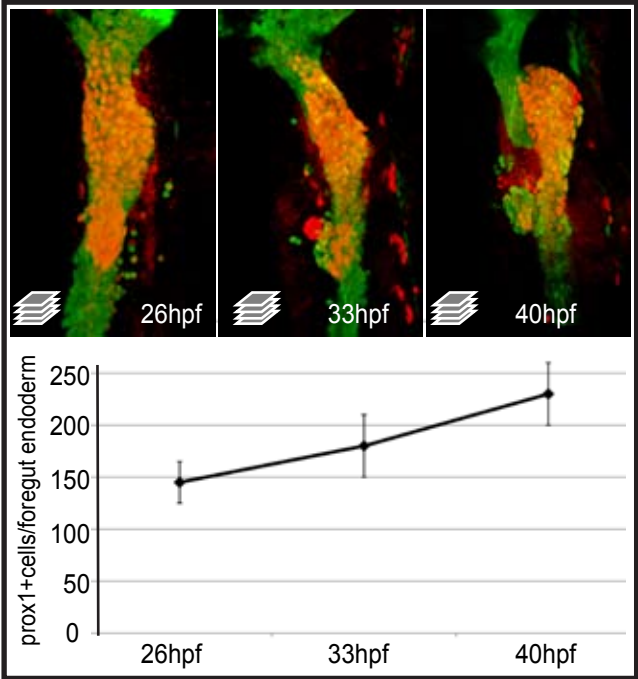

prox1/sox17-GFP

B)

nav3a-mo

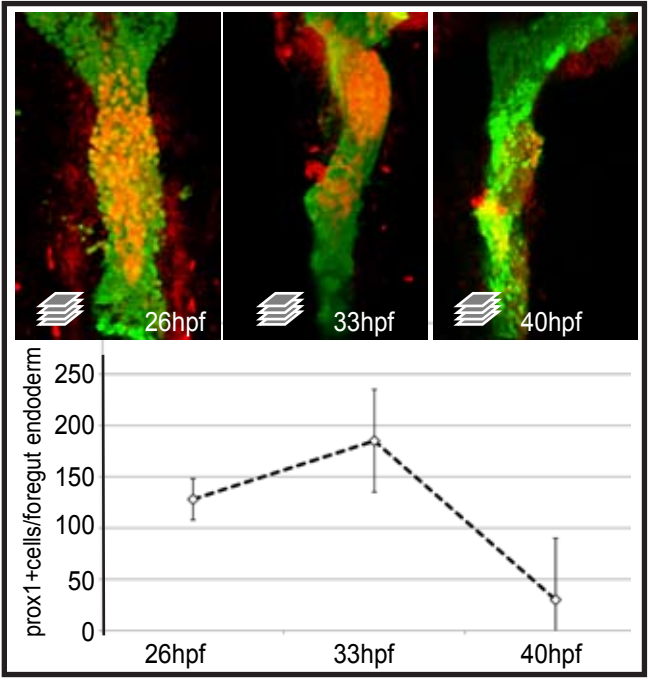

prox1/sox17-GFP

Supplement: dev056861figs10.pdf [file dev056861figs10.pdf]

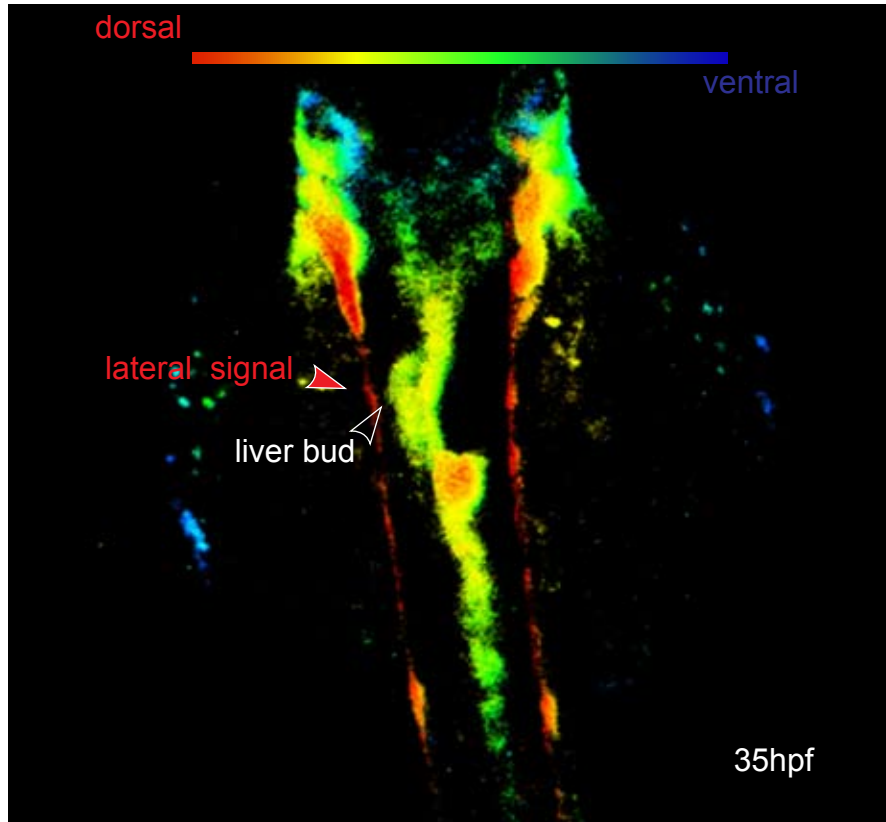

Supplement: dev056861figs11.pdf [file dev056861figs11.pdf]

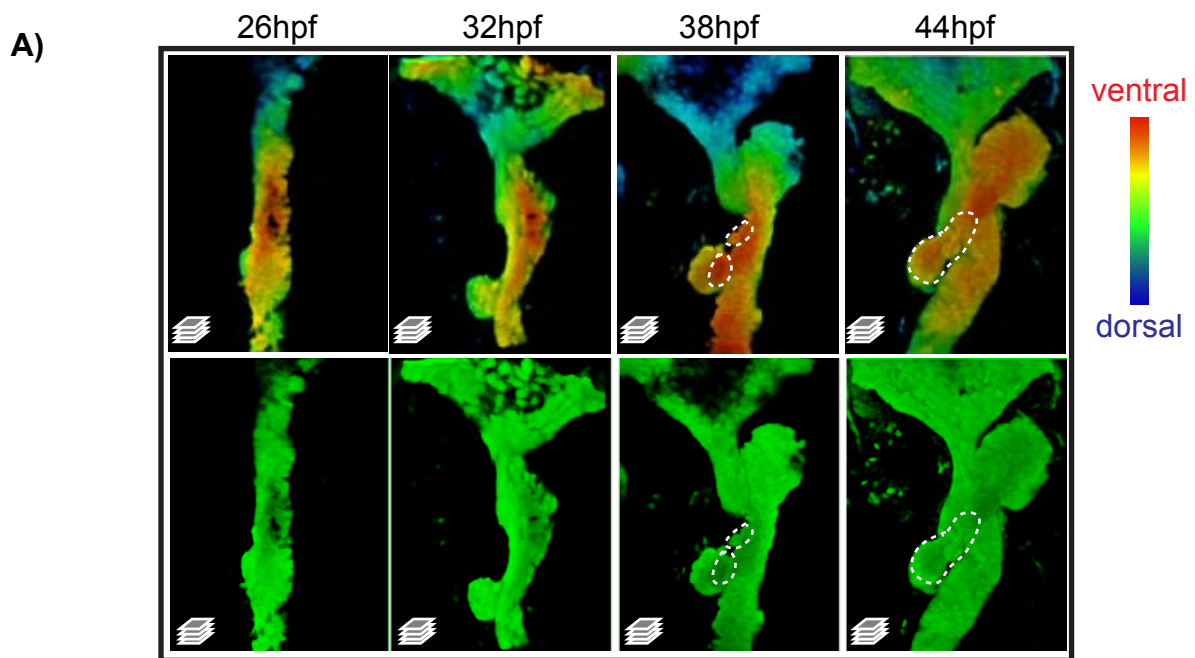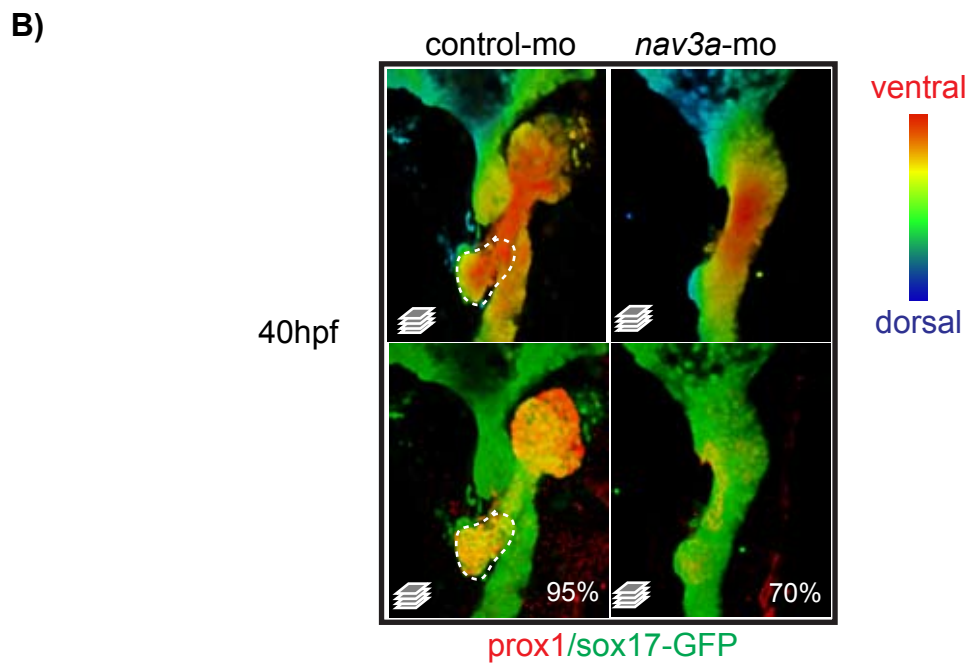

Supplement: dev056861figs12.pdf [file dev056861figs12.pdf]

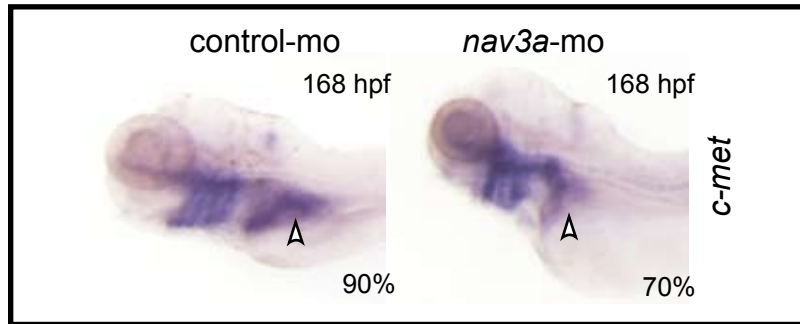

Supplement: dev056861figs13.pdf [file dev056861figs13.pdf]

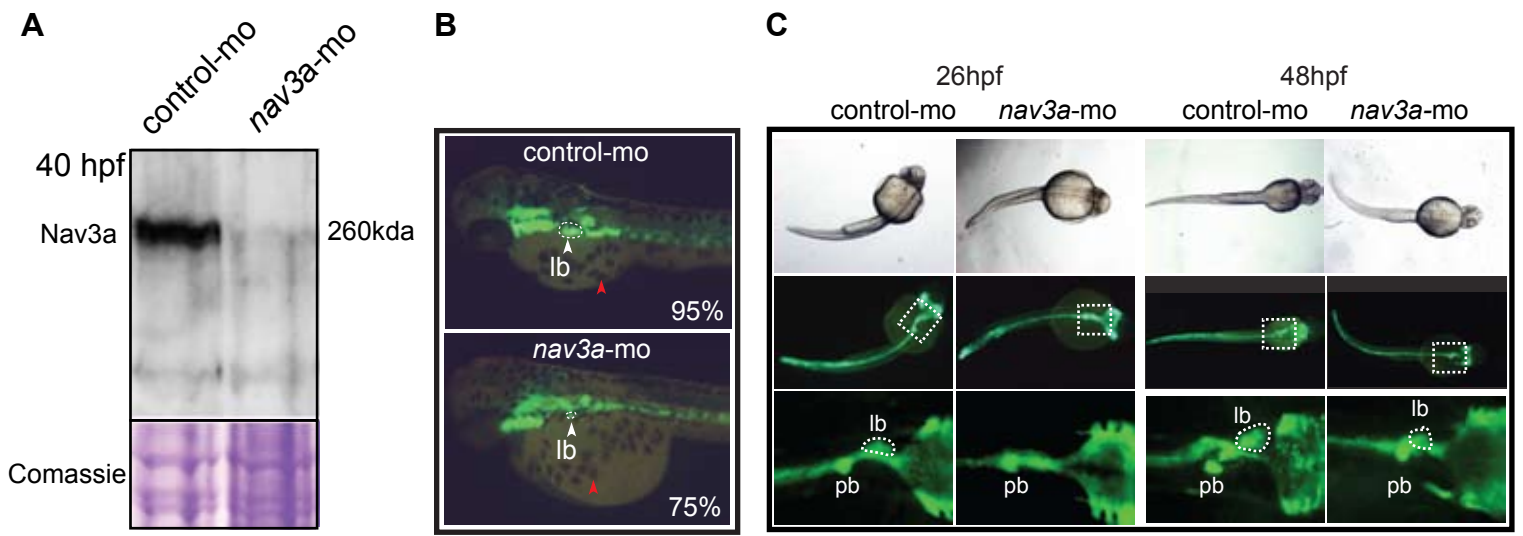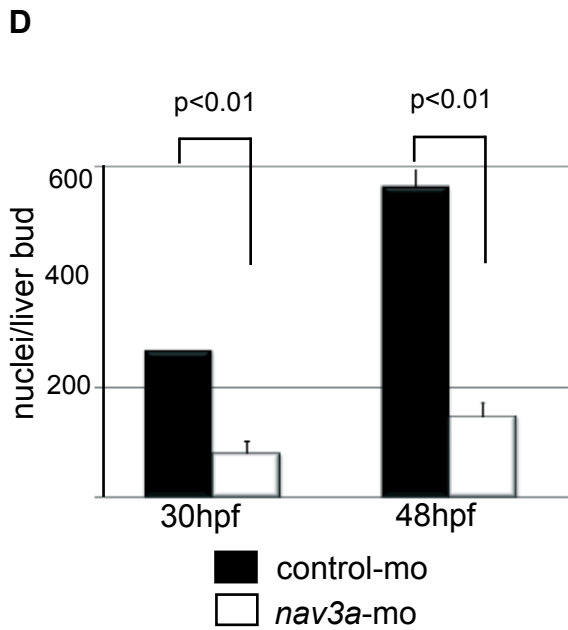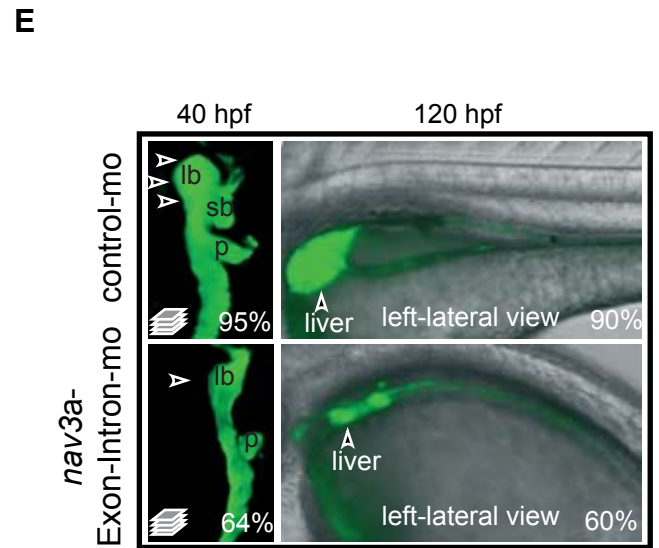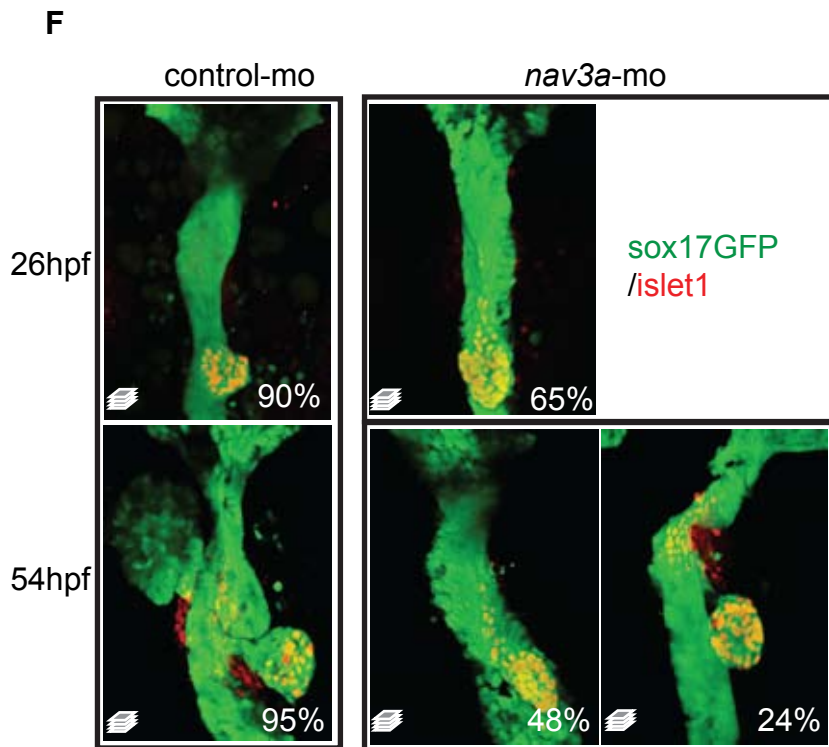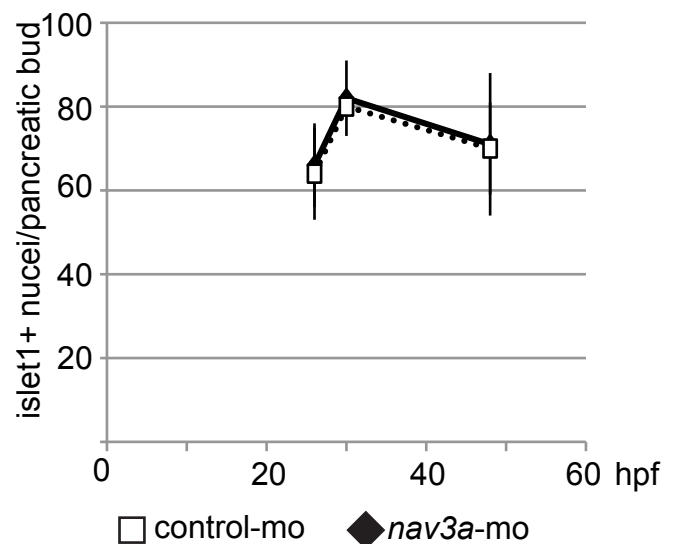

Supplement: dev056861figs3.pdf [file dev056861figs3.pdf]

**A**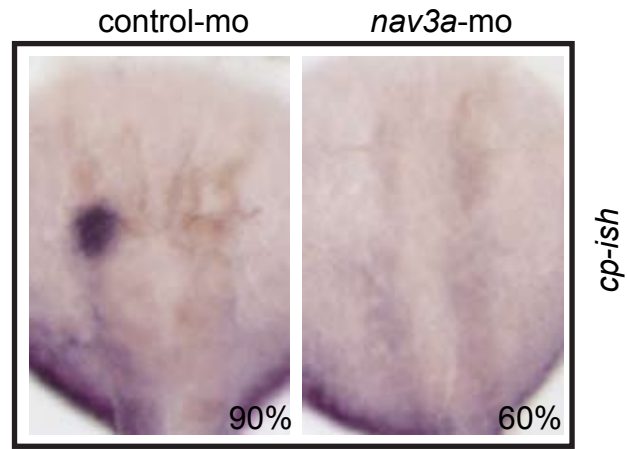**B**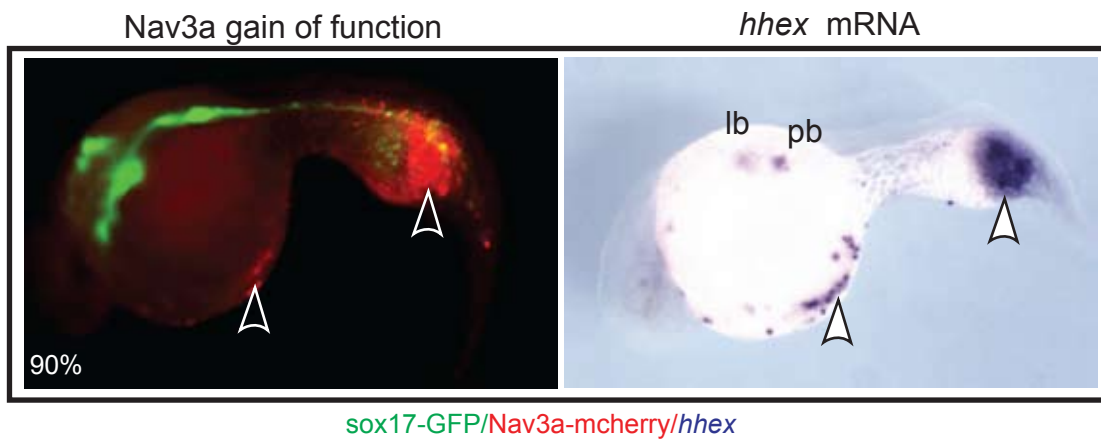**C**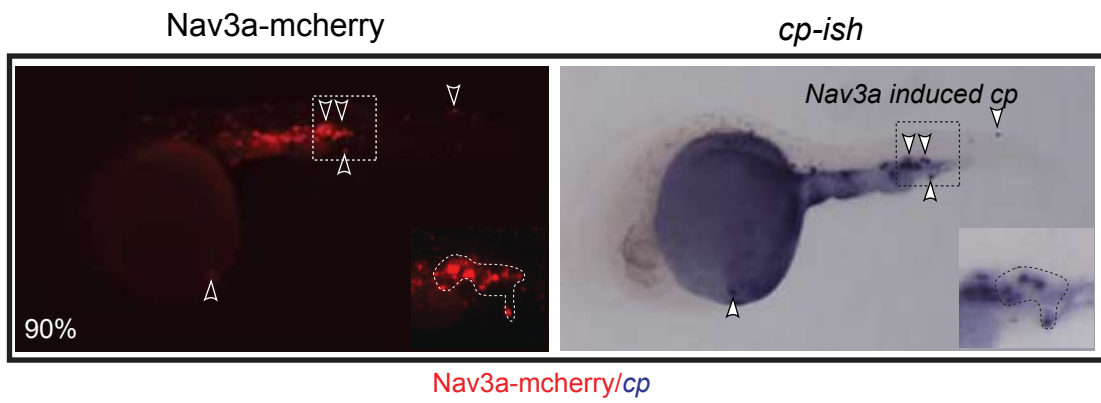**D**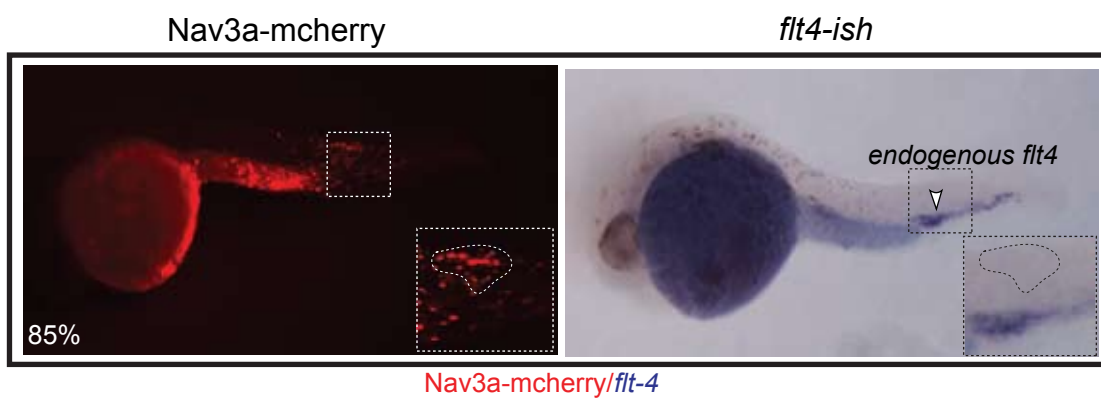

Supplement: dev056861figs4.pdf [file dev056861figs4.pdf]

A)

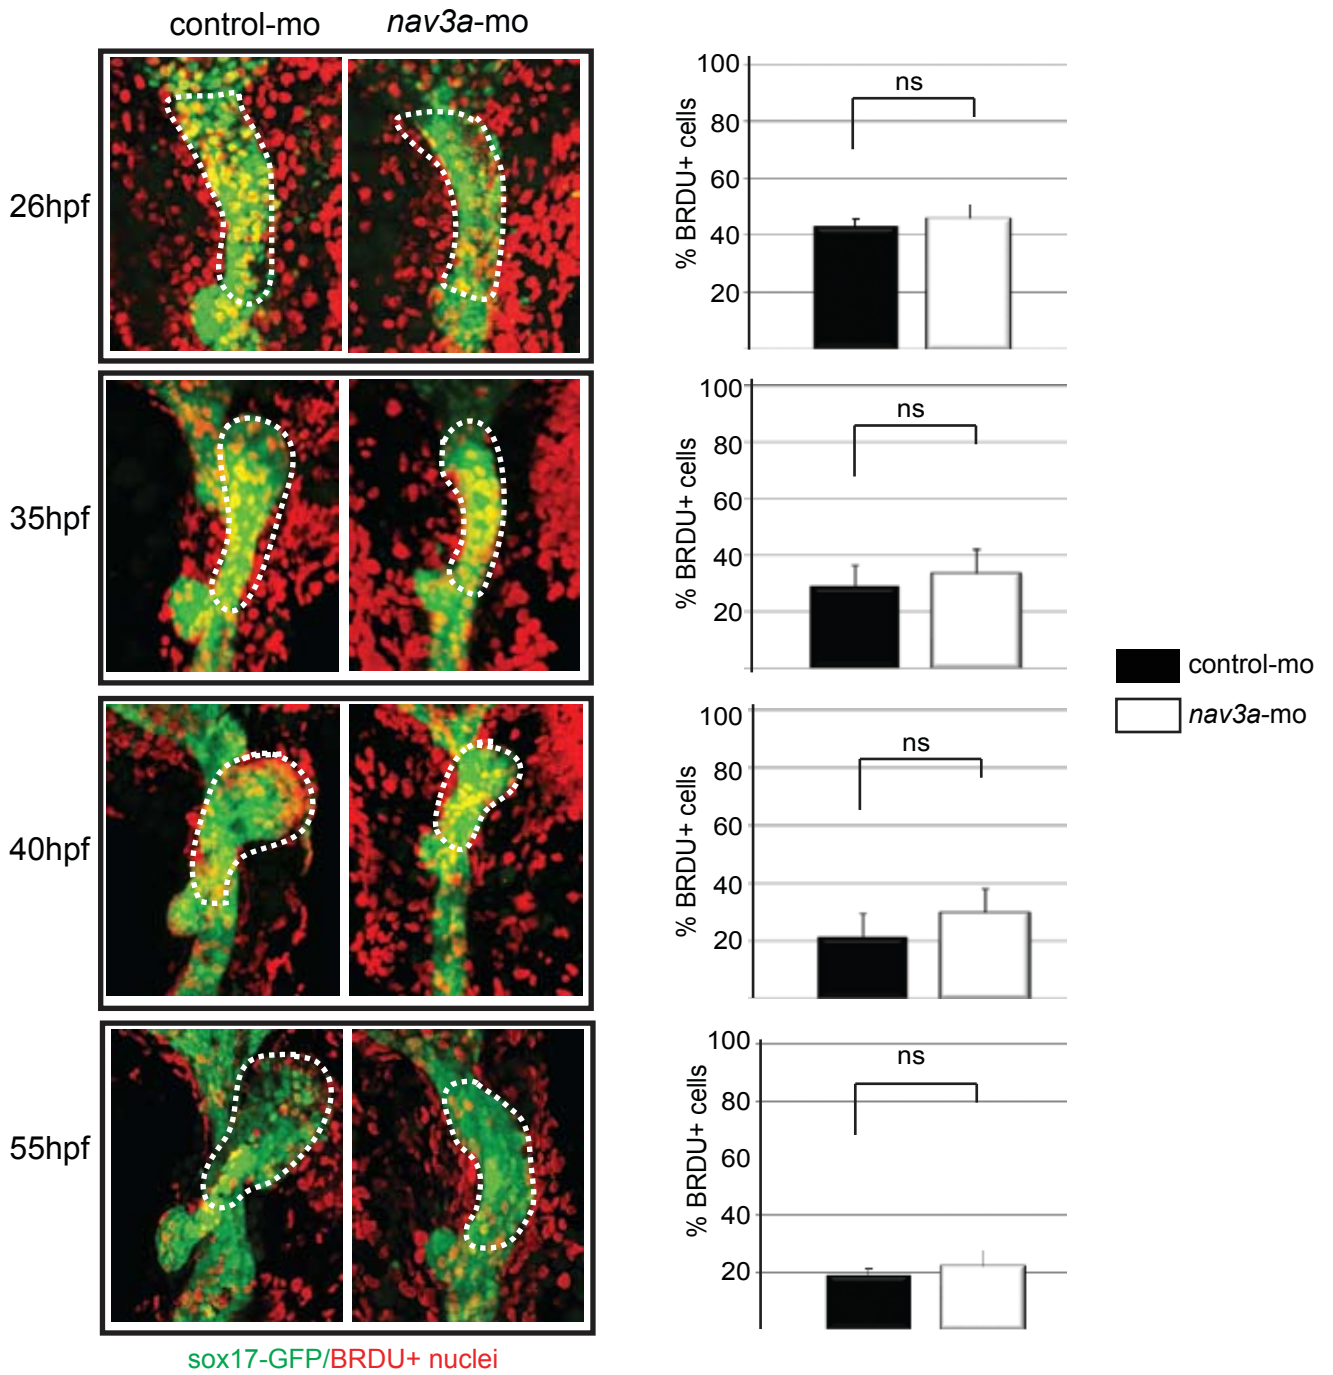

B)

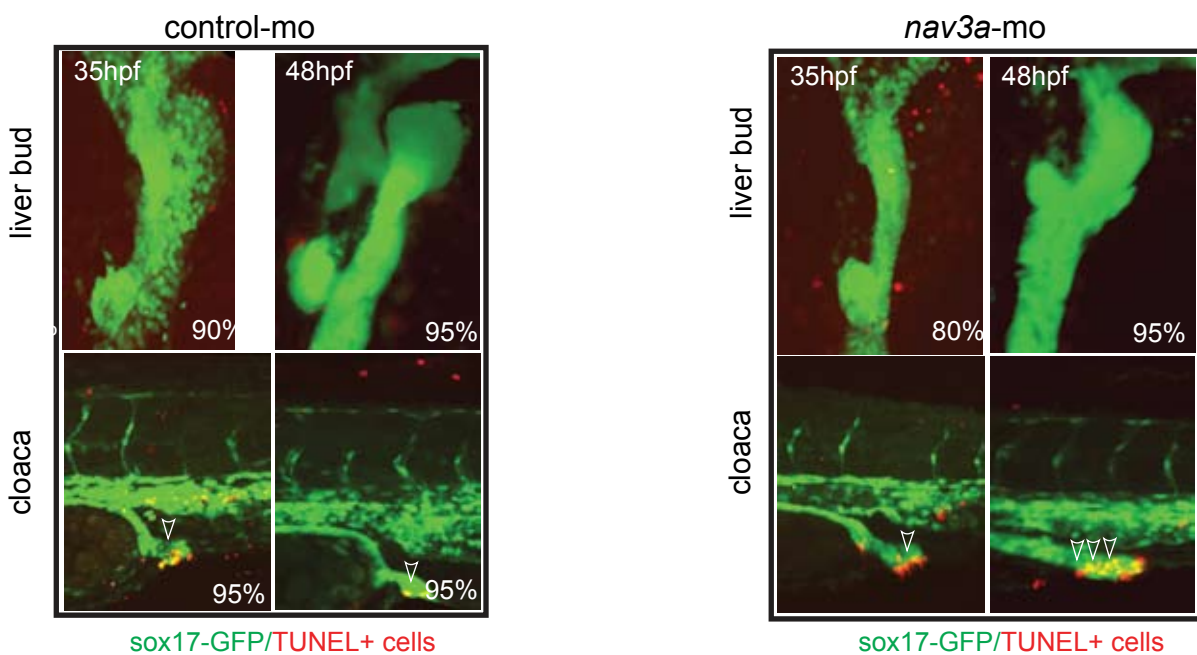

Supplement: dev056861figs5.pdf [file dev056861figs5.pdf]

**A**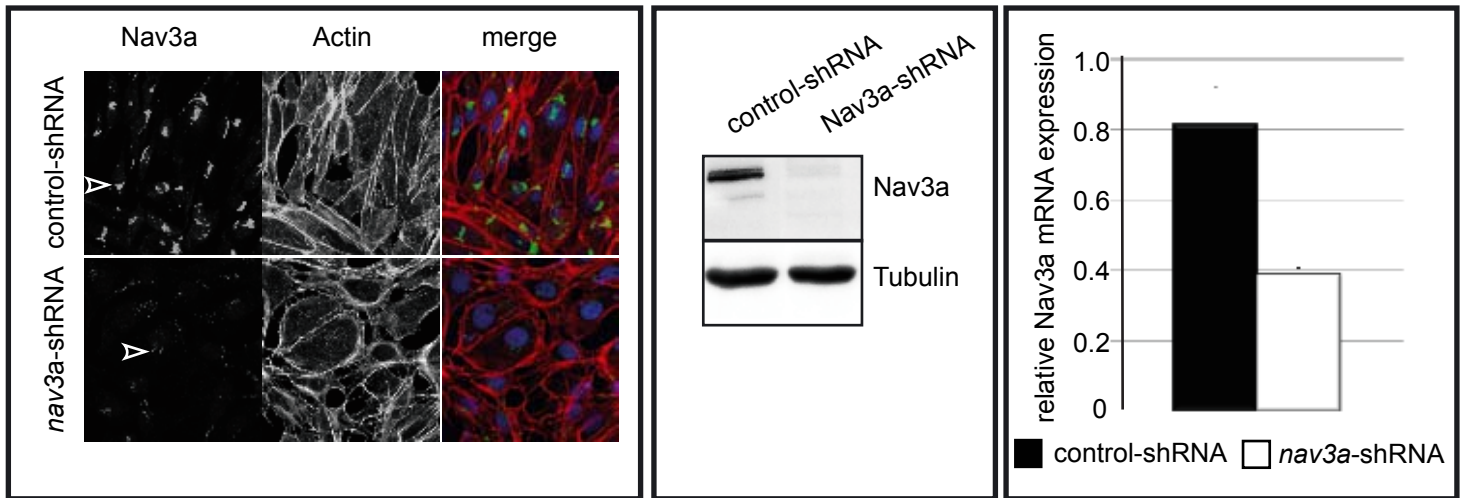**B**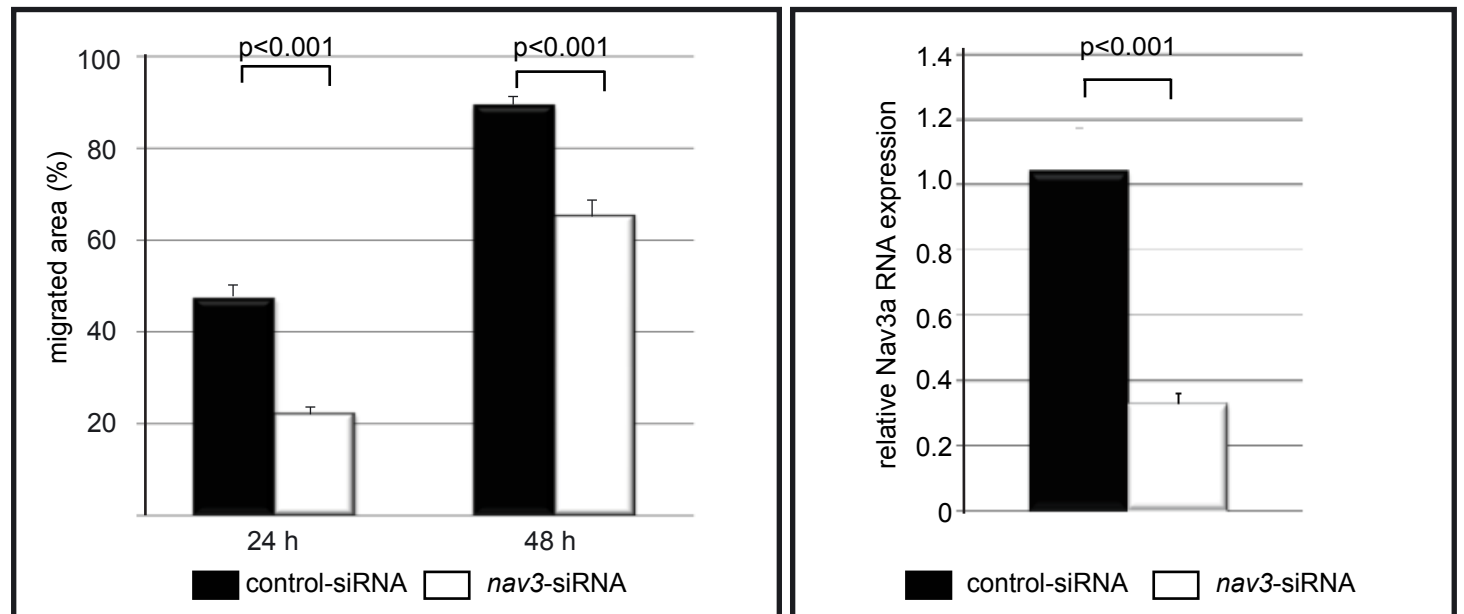

Supplement: dev056861figs6.pdf [file dev056861figs6.pdf]

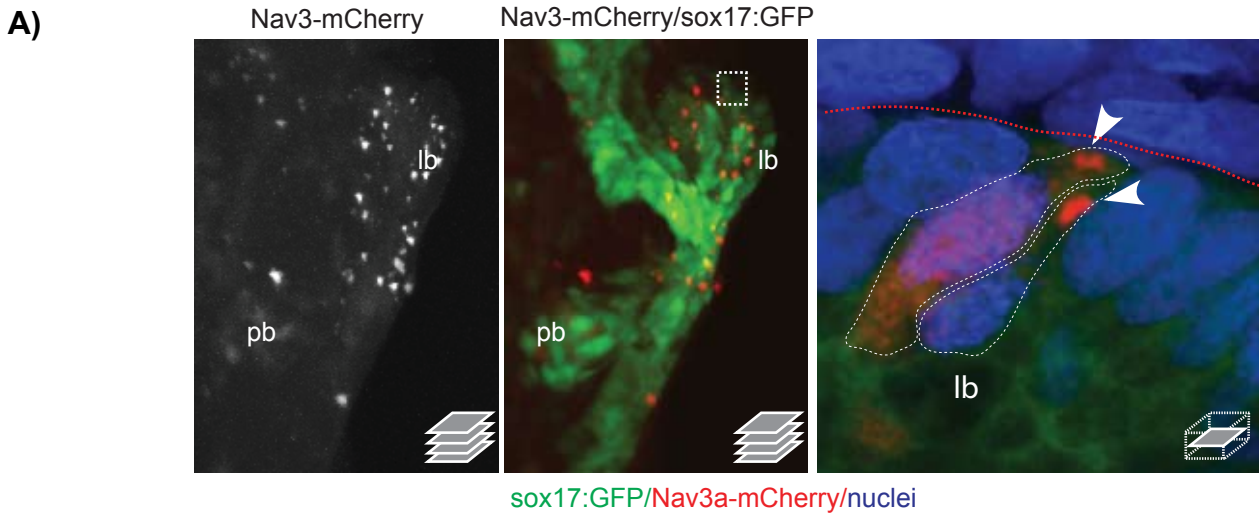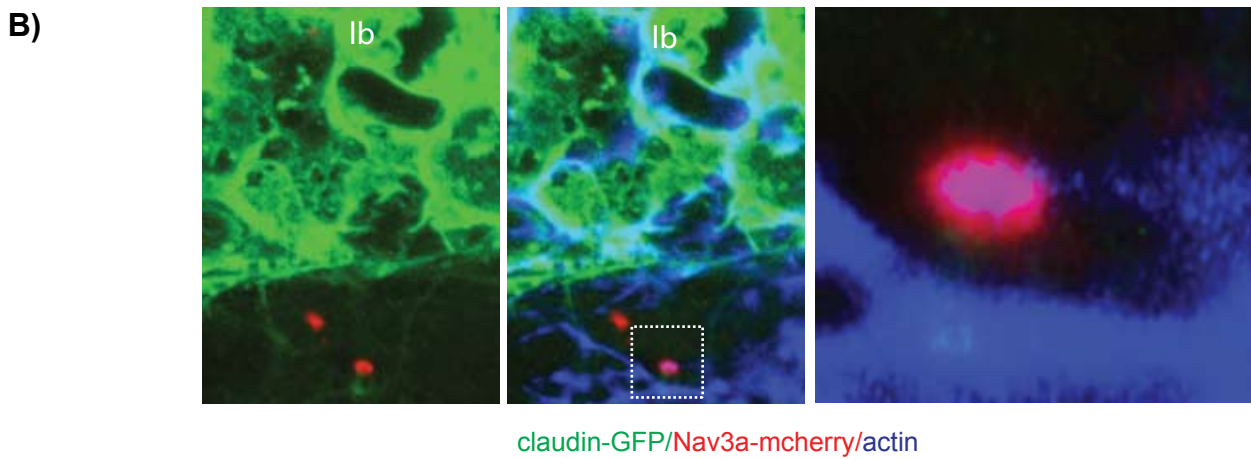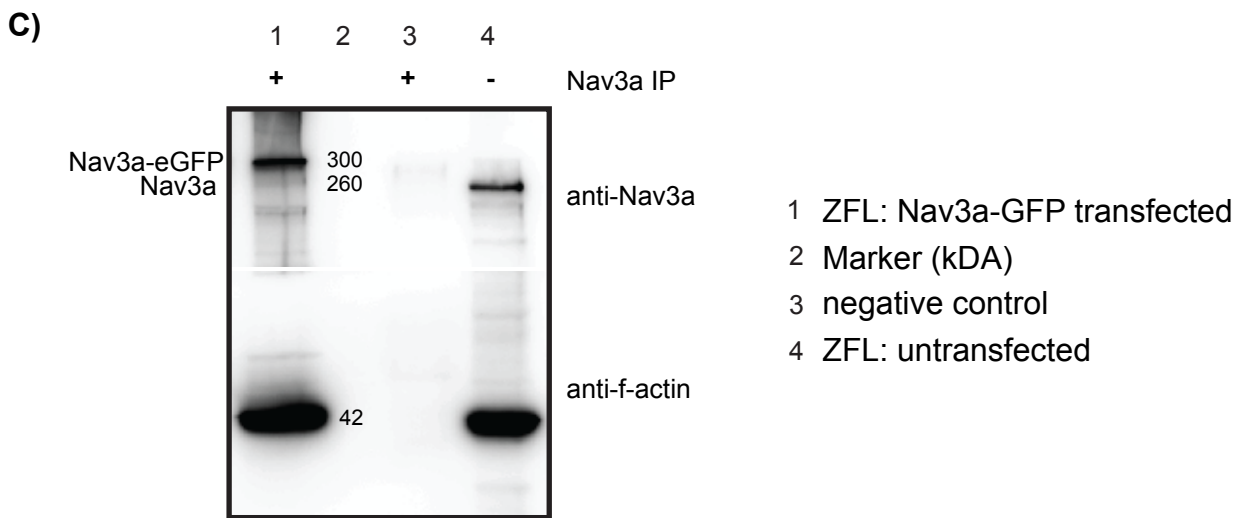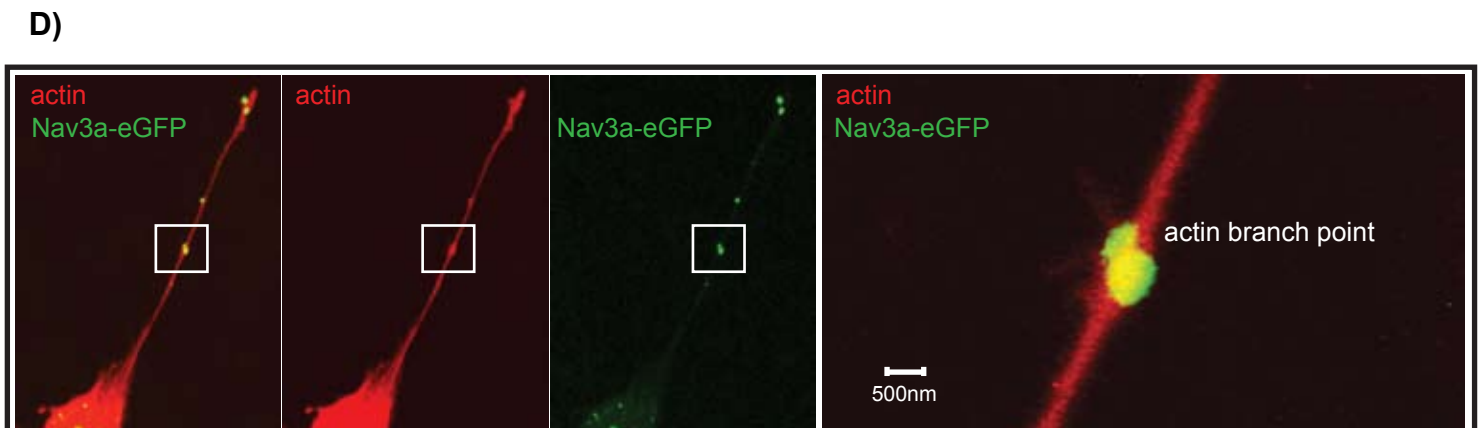

Supplement: dev056861figs7.pdf [file dev056861figs7.pdf]

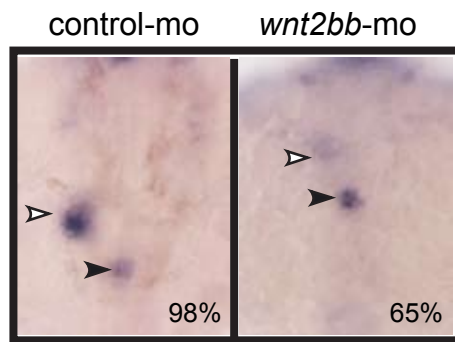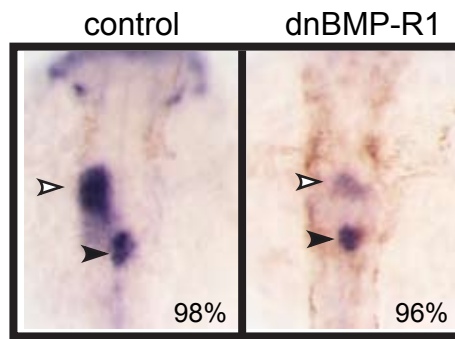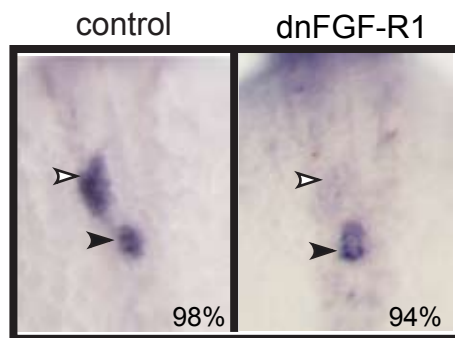

Supplement: dev056861figs8.pdf [file dev056861figs8.pdf]

Nav3-fl-gfp

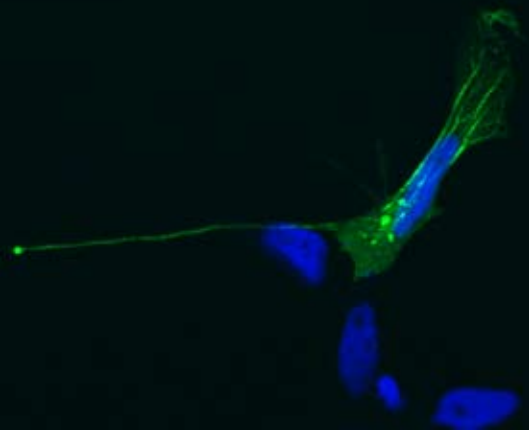

Nav3a-AK

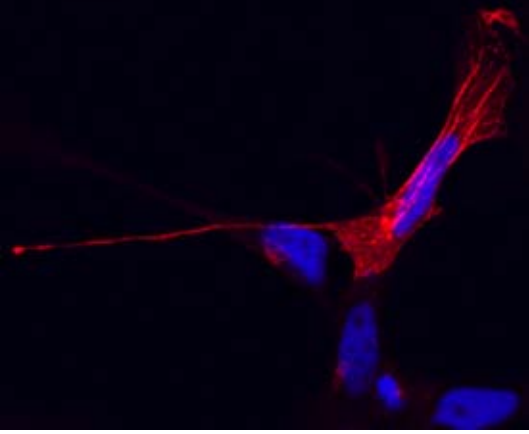

Nav3-fl-gfp  
Nav3a-AK >merge

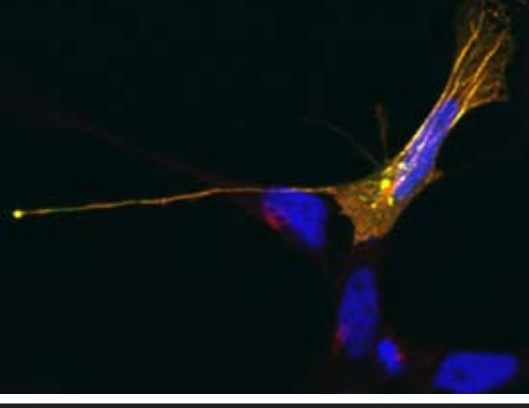

Supplement: dev056861figs9.pdf [file dev056861figs9.pdf]
